# Supplementary material
Source: MDPI journal article supplement (https://www.mdpi.com/2076-3298/10/7/125)
Supplement: s1 [file s1]

**Table S1.** List of sequences of *Lampetra fluviatilis* selected from GenBank. Accession number, voucher, origin and referenced study are indicated.

| <b>Accession Number</b> | <b>Voucher</b> | <b>Country of Origin</b> | <b>Source</b> |
|-------------------------|----------------|--------------------------|---------------|
| EU596026                | LFLUST1        | Russia, Neva             | [10]          |
| EU596030                | LFLUST5        | Russia, Neva             | [10]          |
| EU596035                | LFLUST10       | Russia, Neva             | [10]          |
| EU596036                | LFLUST11       | Russia, Neva             | [10]          |
| EU596038                | LFLUST13       | Russia, Neva             | [10]          |
| EU596042                | LFLUST17       | Russia, Neva             | [10]          |
| EU596123                | LPLAGI7        | Germany, Rhine           | [10]          |
| EU596128                | LPLAGI13       | Germany, Rhine           | [10]          |
| EU596129                | LPLAGI14       | Germany, Rhine           | [26]          |
| EU596141                | LPLAGI27       | Germany, Rhine           | [10]          |
| EU596144                | LPLAGI30       | Germany, Rhine           | [10]          |
| EU404079                | Lf104          | Germany, Warnow          | [22]          |
| EU404080                | Lf185          | Germany, Elbe            | [22]          |
